# Supplementary material for: Usefulness of protocol-based pharmacotherapy management by pharmacists in cancer patients: a retrospective observational study
Source: Research Square preprint supplement (doi:10.21203/rs.3.rs-7408890/v1), 2025-09-01
Supplement: Supplementary file 1 [file 03cb998e0cda3c574c1653ba.xlsx]

## Sheet: Table3
Variable		Pre-PBPM		Post-PBPM	P-value
Administrations (n)		634		594
Male sex, n (%)		343 (54.1)		288 (48.5)	0.052
Median age (range), years		67 (23-93)		66 (24-94)	0.092
Type of cancer, n (%)	Stomach cancer	37 (5.8)		34 (5.7)	0.052
	Hepatocellular carcinoma	105 (16.6)		99 (16.7)
	Colorectal cancer	173 (27.3)		140 (23.6)
	Breast cancer	57 (9.0)		50 (8.4)
	Brain tumor	56 (8.8)		54 (9.1)
	Lung cancer	101 (15.9)		78 (13.1)
	Gynecological cancer	105 (16.6)		139 (23.4)
Chemotherapy, n (%)	Bevacizumab	529 (83.4)		499 (84.0)	0.06
	Ramucirumab	99 (15.6)		95 (16.0)
	Aflibercept	6 (0.9)		0
Ordered job type, n (%)	Physician	626 (100)		577 (98.5)	0.001
	Pharmacist	0		9 (1.5)
	Unmeasured	8		8
Compliance rate (%)		98.7		98.7	1
