# Supplementary material for: Usefulness of protocol-based pharmacotherapy management by pharmacists in cancer patients: a retrospective observational study
Source: Research Square preprint supplement (doi:10.21203/rs.3.rs-7408890/v1), 2025-09-01
Supplement: Supplementary file 2 [file 1e703d67b12cca37d2492489.xlsx]

## Sheet: Table5
Queries regarding addition of laboratory test items	Fiscal year
	2021	2022	2023
UPC ratio	5/7	20/22	9/13
Serum magnesium	3/3	2/3	0
ICI-related laboratory tests	19/22	39/45	48/64
Other	42/49	42/48	91/105
Total	69/81	103/118	148/182
