# Supplementary material for: Usefulness of protocol-based pharmacotherapy management by pharmacists in cancer patients: a retrospective observational study
Source: Research Square preprint supplement (doi:10.21203/rs.3.rs-7408890/v1), 2025-09-01
Supplement: Supplementary file 3 [file 6b7977fe3dd0b82e1d69f1f8.xlsx]

## Sheet: Table6
Laboratory tests ordered by pharmacists (n)	Fiscal year
	2021	2022	2023
HBV-PBPM	29	188	280
UPC-PBPM	0	11	35
Mg-PBPM	0	8	9
Total	29	207	324
