# Supplementary material for: Usefulness of protocol-based pharmacotherapy management by pharmacists in cancer patients: a retrospective observational study
Source: Research Square preprint supplement (doi:10.21203/rs.3.rs-7408890/v1), 2025-09-01
Supplement: Supplementary file 4 [file a425b65ed2a61e9e271dc44e.xlsx]

## Sheet: Table1
Nature of prescription query	Proposal (n)	Accepted (n)	Acceptance rate (%)
Order error ex. Not ordered, Differences between categories (inpatient/outpatient)	116	110	95
Hepatitis B-related issues	94	60	64
Additional laboratory tests	81	69	85
Additional zoledronic acid or denosumab	46	42	91
Change in anticancer drug dosage	43	24	56
Administer based on blood test results	39	10	26
Change in supportive care	34	28	82
Other	16	12	75
Adding or removing vitamin B12 preparations	11	10	91
Total	480	365	76
