# Supplementary material for: Usefulness of protocol-based pharmacotherapy management by pharmacists in cancer patients: a retrospective observational study
Source: Research Square preprint supplement (doi:10.21203/rs.3.rs-7408890/v1), 2025-09-01
Supplement: Supplementary file 5 [file a912dac7a25af6e3b55b0b95.xlsx]

## Sheet: Table2
Variable		Pre-PBPM		Post-PBPM	P-value
Patients (n)		86		83
Male sex, n (%)		48 (56)		44 (53)	0.759
Median age (range), years		71 (26-88)		72 (27-90)	0.755
Department (n)	Hematology	21 (24.4)		25 (30.1)	0.864
	Hepatobiliary and Pancreatic Surgery	4 (4.7)		2 (2.4)
	Dermatology	3 (3.5)		2 (2.4)
	Gynecology	6 (7.0)		9 (10.8)
	Otolaryngology	3 (3.5)		6 (7.2)
	Oncology	3 (3.5)		1 (1.2)
	Gastrointestinal	18 (20.9)		16 (19.3)
	Pulmonary	18 (20.9)		13 (15.7)
	Breast	5 (5.8)		4 (4.8)
	Neurology	0		1 (1.2)
	Urology	5 (5.8)		4 (4.8)
Ordered job type, n (%)	Physician	259 (100)		174 (75.0)	<0.001
	Pharmacist	0		58 (25.0)
Medin non compliance period (range) , month		5 (2-8)		4 (3-4)	0.003
Compliance rate, n (%)		55 (64.0)		71 (85.5)	0.001
