# Supplementary material for: Usefulness of protocol-based pharmacotherapy management by pharmacists in cancer patients: a retrospective observational study
Source: Research Square preprint supplement (doi:10.21203/rs.3.rs-7408890/v1), 2025-09-01
Supplement: Supplementary file 6 [file c3312f97ce14c299042675c3.xlsx]

## Sheet: Table4
Variable		Pre-PBPM		Post-PBPM	P-value
Administrations (n)		95		122
Male sex, n (%)		36 (37.9)		67 (54.9)	0.014
Median age (range), years		63 (32-75)		63 (45-83)	0.085
Type of cancer, n (%)	Colorectal cancer	78 (82.1)		87 (71.3)	0.078
	Head and neck cancer	17 (17.9)		35 (28.7)
Chemotherapy, n (%)	Cetuximab	25 (26.3)		63 (51.6)	<0.001
	Panitumumab	70 (73.7)		59 (48.4)
Serum magnesium CTCAE grade, n (%)	Normal	30 (31.6)		57 (46.7)	0.007
	G1	61 (64.2)		59 (48.4)
	G2	0		4 (3.3)
	G3	0		1 (0.8)
	Unmeasured	4 (4.2)		1 (0.8)
Ordered job type, n (%)	Physician	91 (100)		117 (96.7)	0.137
	Pharmacist	0		4 (3.3)
	Unmeasured	4		1
Compliance rate (%)		95.8		99.2	0.171
